1 **RNA-seq sample preparation kits strongly affect transcriptome profiles of a gas-fermenting bacterium**

2

3 Lorena Azevedo de Lima,<sup>a,\*</sup> Kristina Reinmets,<sup>a,\*</sup> Lars Keld Nielsen,<sup>b,c,d</sup> Esteban Marcellin,<sup>b,c</sup> Audrey Harris,<sup>e</sup>

4 Michael Köpke,<sup>e</sup> Kaspar Valgepea<sup>a,#</sup>

5

6 <sup>a</sup>ERA Chair in Gas Fermentation Technologies, Institute of Technology, University of Tartu, 50411 Tartu, Estonia

7 <sup>b</sup>Australian Institute for Bioengineering and Nanotechnology (AIBN), The University of Queensland, 4072 St. Lucia,

8 Australia

9 <sup>c</sup>ARC Centre of Excellence in Synthetic Biology, The University of Queensland, 4072 St. Lucia, Australia

10 <sup>d</sup>The Novo Nordisk Foundation Center for Biosustainability, Technical University of Denmark, 2800 Kongens Lyngby,

11 Denmark

12 <sup>e</sup>LanzaTech Inc., 60077 Skokie, USA

13 \*These authors contributed equally to this work. Author order was determined alphabetically.

14 #Address correspondence to Kaspar Valgepea, [kaspar.valgepea@ut.ee](mailto:kaspar.valgepea@ut.ee)

15

16 **Running title:** Effects of RNA-seq sample preparation

17

18 Word count for abstract: 239

19 Word count for text: 1955

## 20 **Abstract**

21 Transcriptome analysis via RNA sequencing (RNA-seq) has become a standard technique  
22 employed across various biological fields of study. This rapid adoption of the RNA-seq approach has been  
23 mediated, in part, by the development of different commercial RNA-seq library preparation kits  
24 compatible with standard next-generation sequencing (NGS) platforms. Generally, the essential steps of  
25 library preparation such as ribosomal RNA (rRNA) depletion and first-strand cDNA synthesis are tailored  
26 to a specific group of organisms (e.g. eukaryotes vs. prokaryotes) or genomic GC content. Therefore, the  
27 selection of appropriate commercial products is of crucial importance to capture the transcriptome of  
28 interest as closely to the native state as possible without introduction of technical bias. However,  
29 researchers rarely have the resources and time to test various commercial RNA-seq kits for their samples.  
30 This work reports a side-by-side comparison of RNA-seq data from *Clostridium autoethanogenum*  
31 obtained using three commercial rRNA removal and strand-specific library construction products by  
32 NuGEN Technologies, Qiagen, and Zymo Research and assesses their performance relative to published  
33 data. While all three vendors advertise their products as suitable for prokaryotes, we found significant  
34 differences in their performance regarding rRNA removal, strand-specificity, and, most importantly,  
35 transcript abundance distribution profiles. Notably, RNA-seq data obtained with Qiagen products were  
36 most similar to published data and delivered the best results in terms of library strandedness and  
37 transcript abundance distribution range. Our results highlight the importance of finding appropriate  
38 organism-specific workflows and library preparation products for RNA-seq studies.

## 39 **Importance**

40 RNA-seq is a powerful technique for transcriptome profiling while involving elaborate sample  
41 processing before library sequencing. Our work is important as we show that RNA-seq library preparation  
42 kits can strongly affect the outcome of the RNA-seq experiment. Although library preparation benefits  
43 from the availability of various commercial kits, choosing appropriate products for the specific samples  
44 can be challenging for new users or for users working with unconventional organisms. Evaluating the  
45 performance of different commercial products requires significant financial and time investment  
46 infeasible to most researchers. Therefore, users are often guided in their choice of kits by published data  
47 involving similar input samples. We conclude that important consideration should be given to selecting of  
48 sample processing workflows for any given organism.

## 49 **Introduction**

50           Gene transcription is a fundamental process mediating vast number of intracellular and  
51 environmental responses in every cell. Therefore, understanding transcriptional states of any organism of  
52 choice can shed light on basic biological processes as well as ways to direct and control cellular behavior.  
53 Insights into cellular transcriptional profiles or transcriptomes (i.e. complete set of transcripts in a cell  
54 with their quantities) have vastly expanded in the last decade due to rapid development and high  
55 accessibility of next generation sequencing (NGS) platforms (1). Meanwhile, constant improvement of  
56 commercial library construction products has greatly contributed to the rapid adaptation and evolution  
57 of RNA sequencing applications: for example, RNA-seq (2), nascent RNA sequencing (3), Ribo-seq (4), and  
58 differential RNA-seq (5). RNA-seq is the most common application as it allows both mapping and  
59 quantification of transcriptomes.

60           While RNA-seq has become widely used across all fields of biological sciences, obtaining high-  
61 quality data of the transcriptome under investigation nevertheless requires careful planning, extensive  
62 sample processing, and considerable resources. The availability of commercial RNA-seq library  
63 preparation kits tailored to a variety of organisms, experimental approaches, and sequencing platforms  
64 has made RNA-seq accessible even to non-expert users. When planning to do an RNA-seq experiment for  
65 the first time, researchers often consult existing literature to see which sample preparation protocols and  
66 products have been previously used with their organism of interest. However, working with  
67 unconventional microorganisms that have not yet been extensively studied via RNA-seq can make it  
68 difficult to decide which commercial kits might be most suitable.

69           We have previously achieved high-quality transcriptome profiling using RNA-seq for the gas-  
70 fermenting bacterium *Clostridium autoethanogenum* (6–8), an unconventional microbe that is also used  
71 as a cell factory in commercial-scale gas fermentation for the production of low carbon fuels and chemicals  
72 from waste feedstocks (9). In addition to preparation of cDNA libraries before sequencing, removal of

73 ribosomal RNA (rRNA) from the extracted total RNA is needed to ensure efficient transcriptome-wide  
74 messenger RNA (mRNA) detection and quantification as >80–90% of total cellular RNA is rRNA (10, 11). In  
75 our previous studies (6–8), we used Illumina kits for rRNA removal and library preparation but when we  
76 set out to start a large-scale RNA-seq survey of the same organism in late 2019, the Illumina Ribo-Zero  
77 rRNA removal kit was discontinued, and we had to look for alternatives. However, selecting an efficient  
78 rRNA removal method for bacterial samples is non-trivial as enrichment of non-rRNA transcripts based on  
79 polyadenylated RNA (polyA) selection used in most commercial kits (developed for eukaryotes) is not  
80 applicable for bacterial RNA due to the lack of polyA tails. One also has to ensure the compatibility of the  
81 rRNA removal and cDNA library preparation methods.

82         To make an informed decision on the following best commercial products for RNA-seq library  
83 preparation for *C. autoethanogenum*, we aimed to test kits from three vendors that are advertised to  
84 ensure efficient rRNA removal and to be compatible with a variety of bacterial species and Illumina  
85 sequencing platforms. This work reports a side-by-side comparison of RNA-seq data obtained from the  
86 same *C. autoethanogenum* input samples using rRNA removal and strand-specific library construction kits  
87 from NuGEN Technologies, Qiagen, and Zymo Research, and assesses their performance relative to  
88 published data. Transcriptome profiles revealed significant differences between the kits regarding rRNA  
89 removal efficiency, sequencing reads strand-specificity, and, strikingly, in transcript abundance  
90 distribution profiles. Our work shows that Qiagen kits yield the most reliable data out of the three we  
91 tested and highlights the importance of appropriate sample preparation for RNA-seq analysis in bacteria.

## 92 **Results and Discussion**

93 **Experimental design.** We evaluated the performance of three commercial rRNA removal and  
94 strand-specific library construction kits by NuGEN, Qiagen, and Zymo (see Materials and Methods for  
95 details) for RNA-seq analysis of *C. autoethanogenum* autotrophic cultures (Fig. 1A). To assess the ability  
96 of the selected commercial kits to capture the transcriptomic profile of *C. autoethanogenum* under  
97 varying culture conditions, we used four samples, each obtained from one of the four bioreactor  
98 continuous culture experiments grown on two different feed gas mixes (CO or CO+CO<sub>2</sub>+H<sub>2</sub> [syngas]) and  
99 dilution rates (i.e. specific growth rates; 1 or 2 day<sup>-1</sup>). Both feed gas composition (12) and specific growth  
100 rate (13) of the culture have profound effects on the culture phenotype (e.g. gas uptake, product  
101 distribution, metabolic fluxes). We extracted and prepared total RNA from the four samples using a  
102 previously established workflow optimised for *C. autoethanogenum* (6). Next, total RNA for each sample  
103 was split between the NuGEN, Qiagen, and Zymo kits for rRNA removal and strand-specific RNA-seq library  
104 construction according to vendors' instructions. Finally, the 12 samples (four cultures times three kits)  
105 were examined by paired-end 75 bp sequencing on an Illumina MiSeq platform, followed by RNA-seq data  
106 analysis using established pipelines (6, 13).

107 **General statistics of RNA-seq data.** An average of 4.5 million raw reads per sample were obtained  
108 from the sequencing runs that were mapped to the reference genome of *C. autoethanogenum*  
109 NC\_022592.1 (14) after trimming with an overall high success rate (Table 1). Namely, 98, 93, and 99% of  
110 reads were mapped on average for NuGEN, Qiagen, and Zymo, respectively, which resulted in a minimum  
111 of 50-fold coverage of the *C. autoethanogenum* genome across samples (Table 1). We detected very low  
112 read duplication levels (<0.5%) suggesting a low chance of technical bias introduced during sample  
113 preparation. Surprisingly, a significant difference in the percentage of mapped reads that were assigned  
114 to genomic features (i.e. FeatureCounts) was observed between NuGEN and the other two kits: an  
115 average of only 55% for NuGEN with 84 and 79% for Qiagen and Zymo, respectively (Table 1;

116 FeatureCounts/Mapped). Notably, this can be explained by the difference between NuGEN and the other  
 117 two kits in the percentage of reads mapping to the expected strand, as Qiagen and Zymo showed high  
 118 correct strandedness at ~91 (sense) and ~84% (antisense), respectively, compared to NuGEN’s very poor  
 119 strand-specificity at ~58% (sense) (Table 1). Significant false strandedness for NuGEN could arise from  
 120 either a substantial flaw in the respective workflow or, according to NuGEN, from faulty reagents in their  
 121 kits (personal communication).

122  
 123 **TABLE 1** General statistics of RNA-seq results of the three tested kits for rRNA removal and library  
 124 construction

| Kits   | Sample name | Number of raw reads | Reads mapped (Mapped) | Coverage (fold) | FeatureCounts /Mapped | Strandedness |           | rRNA RPKM/ Total RPKM |
|--------|-------------|---------------------|-----------------------|-----------------|-----------------------|--------------|-----------|-----------------------|
|        |             |                     |                       |                 |                       | Sense        | Antisense |                       |
| NuGEN  | NuGEN_S1    | 4,268,524           | 98%                   | 72              | 59%                   | 64%          | 36%       | 7%                    |
|        | NuGEN_S2    | 6,004,018           | 99%                   | 103             | 47%                   | 50%          | 50%       | 2%                    |
|        | NuGEN_S3    | 3,615,864           | 99%                   | 62              | 52%                   | 56%          | 44%       | 4%                    |
|        | NuGEN_S4    | 4,248,288           | 98%                   | 72              | 63%                   | 61%          | 39%       | 15%                   |
| Qiagen | Qiagen_S1   | 4,911,456           | 98%                   | 81              | 87%                   | 95%          | 5%        | 15%                   |
|        | Qiagen_S2   | 3,559,522           | 95%                   | 57              | 79%                   | 84%          | 16%       | 9%                    |
|        | Qiagen_S3   | 3,289,702           | 93%                   | 50              | 82%                   | 88%          | 12%       | 6%                    |
|        | Qiagen_S4   | 4,954,218           | 88%                   | 74              | 88%                   | 96%          | 4%        | 17%                   |
| Zymo   | Zymo_S1     | 4,355,956           | 99%                   | 71              | 82%                   | 13%          | 87%       | 0.8%                  |
|        | Zymo_S2     | 4,840,762           | 99%                   | 79              | 70%                   | 26%          | 74%       | 0.6%                  |
|        | Zymo_S3     | 5,691,744           | 99%                   | 93              | 78%                   | 18%          | 82%       | 0.6%                  |
|        | Zymo_S4     | 4,651,118           | 99%                   | 76              | 87%                   | 7%           | 93%       | 0.8%                  |

125 rRNA, ribosomal RNA; RPKM, reads per kilobase of transcript per million mapped reads.

126  
 127 **Variable efficiency of rRNA removal.** We next quantified rRNA removal efficiencies from the RNA-  
 128 seq data using the percentage of rRNA transcript abundances from total transcript abundances, expressed  
 129 as reads per kilobase of transcript per million mapped reads (RPKM) (Table S1). Again, stark differences  
 130 between the kits were observed, confirming that rRNA depletion from bacterial samples is non-trivial  
 131 (Table 1, rRNA RPKM/Total RPKM). Zymo demonstrated superior efficiency for rRNA removal during  
 132 library preparation with an abundance of <1% of rRNA transcripts. NuGEN’s higher variability in rRNA

133 removal efficiency across the samples (2–15%; average 7%) suggests their approach of non-rRNA  
134 enrichment or AnyDeplete™ technology may be sensitive to sample-specific factors. Removal of rRNA for  
135 Qiagen was slightly less efficient (~11%) than for NuGEN but still acceptable to ensure high coverage of  
136 transcriptome-wide mRNA detection and quantification (Table 1).

137 **Kit-specific grouping of transcriptome profiles.** Upon observing the differences in general RNA-  
138 seq metrics outlined in Table 1, we were curious if different kits could also lead to variable transcriptome  
139 profiles. Indeed, principal component analysis (PCA) of transcript abundances revealed clear sample  
140 grouping by the kit and not by the origin of the input RNA (Fig. 1B). To assess which of the three tested  
141 kits produced the most reliable transcriptome profiles, we also included published data in the PCA that  
142 we previously obtained using the same workflows but with Illumina kits for similar *C. autoethanogenum*  
143 culture conditions (6), termed here as the reference dataset (high biomass concentration samples in GEO  
144 accession number GSE90792). Notably, Qiagen data was grouped the closest to this reference dataset  
145 with NuGEN transcriptome profiles separating most distinctively (Fig. 1B). These observations were  
146 confirmed by hierarchical clustering of individual transcript abundances showing grouping of samples  
147 based on the kits and not based on the origin of the input RNA (Fig. 1C). NuGEN and Zymo had a  
148 distinctively different clustering pattern compared to Qiagen and the reference dataset.

149 Clustering results agreed with Spearman's correlation analysis of transcript abundances between  
150 samples, which showed Qiagen data being most similar to the reference dataset ( $\rho \sim 0.86$ ) (Fig. 1D).  
151 Within the three kits tested here, Qiagen and Zymo data showed higher similarity ( $\rho \sim 0.77$  across the  
152 same samples) compared to the lower correlations between NuGEN and Qiagen ( $\rho \sim 0.33$ ) and NuGEN  
153 and Zymo ( $\rho \sim 0.47$ ) data.



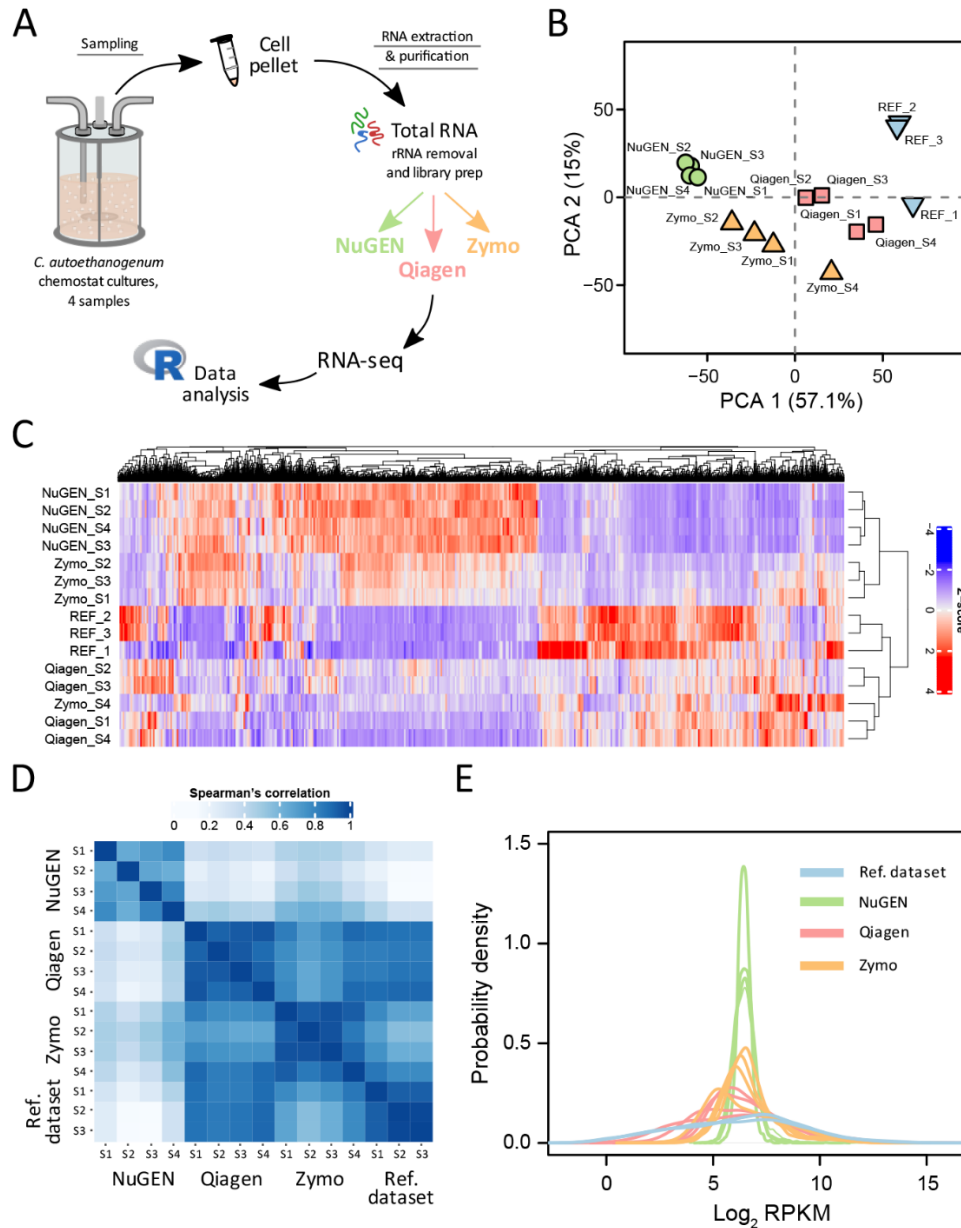

154

155 **FIG 1** RNA-seq results are strongly affected by rRNA removal and library construction kits. (A) Experimental design  
 156 of this work. (B) Principal component analysis (PCA) of transcript abundances. (C) Hierarchical clustering of individual  
 157 transcript abundances. (D) Spearman's correlation analysis of transcript abundances. (E) Probability density plots of  
 158 transcript abundances. The reference dataset refers to high BC samples in GEO accession number GSE90792. REF,  
 159 reference dataset. rRNA transcript abundances were removed prior to data analysis to avoid bias from variable  
 160 efficiency of rRNA removal between kits.

161

162           **Differences in transcript abundance distribution profiles.** The quality of the kits can also be  
163 assessed by their sensitivity to detect transcripts across a range of abundances (i.e. transcriptome  
164 coverage or depth). Transcript levels in bacteria generally span over 4 orders of magnitude (15–17),  
165 including in *C. autoethanogenum* (6) and other gas-fermenting bacteria (18, 19). Again, Qiagen data  
166 resembled the reference dataset the most by both the transcript abundance distribution profiles and good  
167 sensitivity with transcript levels spanning over 4 orders of magnitude (from ~2 to ~39,000 RPKM; ~1 to  
168 15 log<sub>2</sub> RPKM) (Fig. 1E). Strikingly, NuGEN kit showed very narrow transcript abundance distributions  
169 covering only ~2 orders of magnitude (from ~22 to ~1,800 RPKM; ~4 to ~11 log<sub>2</sub> RPKM), while Zymo data  
170 were positioned between Qiagen and NuGEN. According to Zymo (personal communication), such  
171 condensed distribution profiles could be caused by higher sensitivity of the workflow towards the  
172 presence of genomic DNA in the input sample that can artificially inflate mRNA reads with a more  
173 prominent effect on low-abundance transcripts, thereby pushing the left tail of the distribution to the  
174 right. This would also be consistent with the poorer strandedness of Zymo and NuGEN data (Table 1)  
175 arising from genomic DNA-originating reads. Our sample preparation workflow previously optimised for  
176 *C. autoethanogenum* (6) efficiently removed DNA from total RNA samples down to  $\sim 13 \pm 2$  ng/ $\mu$ L (average  
177  $\pm$  standard deviation), making up ~4% of the RNA concentration. Thus, additional steps to deplete DNA to  
178 extremely low levels are potentially required for Zymo and NuGEN workflows. NuGEN data could be  
179 additionally explained by biased synthesis and amplification of cDNA using selective primers compared to  
180 the general use of random primers in RNA-seq workflows.

181           Our work is important as researchers rarely have the resources and time to test various  
182 commercial RNA-seq kits, advertised as suitable for multiple organisms with different genomic GC  
183 content, for their samples. The ability to capture the spectrum of transcript abundances as closely to the  
184 true cellular state as possible is crucial to accurately address research questions investigated via RNA-seq.  
185 Our work shows that rRNA removal and library construction kits can strongly affect RNA-seq outcomes.

186 This is highly relevant for anyone establishing an RNA-seq pipeline for an organism or for researchers  
187 puzzled by unexpected RNA-seq results. We conclude that, at least for *C. autoethanogenum* RNA-seq  
188 studies, Illumina and Qiagen kits are most suitable by providing high sensitivity across a wide range of  
189 transcript levels, superior strand-specificity, and sufficient rRNA removal, ensuring high coverage of  
190 transcriptome-wide mRNA detection and quantification.

191

## 192 **Materials and Methods**

193 **Bacterial strain and cultivation conditions.** A derivative of *Clostridium autoethanogenum* DSM  
194 10061 strain – DSM 23693 – deposited in the German Collection of Microorganisms and Cell Cultures  
195 (DSMZ) was used in all experiments and stored as a glycerol stock at -80°C. Full details of the cultivation  
196 conditions are reported in previous work (13). Shortly, cells were grown autotrophically in bioreactor  
197 chemostat continuous cultures under strictly anaerobic conditions at 37°C and pH 5 in chemically defined  
198 medium (without yeast extract) either on CO (60% CO and 40% Ar; AS Eesti AGA) or syngas (50% CO, 20%  
199 H<sub>2</sub>, 20% CO<sub>2</sub>, and 10% Ar; AS Eesti AGA). Namely, four independent experiments were conducted with  
200 cultures grown at dilution rates (D) ~1.0 and ~2.0 day<sup>-1</sup> on both feed gas mixes. Cultures were sampled  
201 for RNA extraction and subsequent transcriptome analysis using RNA-seq after optical density (OD), gas  
202 uptake, and production rates had been stable for at least one working volume.

203 **Preparation of total RNA extracts.** Full details of culture sampling, RNA extraction, and  
204 purification are reported in previous work (13). Briefly, culture samples were pelleted by centrifugation  
205 and treated with RNeasy Lysis Buffer (76106; Qiagen) before disrupting cells with glass beads using the Precellys®  
206 24 instrument and extracting total RNA using the RNeasy Mini Kit (74104; Qiagen). Next, RNA extracts  
207 were depleted of DNA using off-column TURBO™ DNase (AM2239; Invitrogen) followed by purification  
208 using the RNA Clean & Concentrator™ kit (R1018; Zymo). We used the NanoDrop™ 1000 instrument  
209 (Thermo Fisher Scientific) for verifying efficiency of RNA purification. The high quality and integrity of the

210 total RNA extracts was confirmed by RNA integrity numbers (RIN) above 8.2 using the TapeStation 2200  
211 equipment (Agilent Technologies). Total RNA and residual DNA concentrations were determined using the  
212 Qubit 2.0 instrument (Invitrogen).

213 **Removal of rRNA and RNA-seq library construction.** Total RNA extracts for each sample were  
214 split between the NuGEN, Qiagen, and Zymo kits for rRNA removal and strand-specific RNA-seq library  
215 construction according to vendor instructions. In this work, samples referred to as “NuGEN” were  
216 processed with Universal Prokaryotic RNA-Seq, Prokaryotic AnyDeplete™ (0363; NuGEN); “Qiagen” with  
217 QIAseq® FastSelect™ –5S/16S/23S Kit (335925; Qiagen) (for rRNA removal) and QIAseq® Stranded RNA  
218 Lib Kit (180743; Qiagen) (for library construction); and “Zymo” with Zymo-Seq RiboFree™ Total RNA  
219 Library Kit (R3000; Zymo Research).

220 **RNA sequencing and data analysis.** RNA sequencing of the 12 mRNA libraries (four cultures times  
221 three kits) was performed on a MiSeq instrument (Illumina) using the MiSeq v3 150 cycles sequencing kit  
222 (MS-102-3001; Illumina) with paired-end 2 x 75 bp reads. Raw RNA-seq data of the reference dataset (high  
223 biomass concentration samples in GEO accession number GSE90792) (6) was analysed together with the  
224 data generated in this work to ensure comparability. Full details of RNA-seq data analysis, including R-  
225 scripts, are reported in previous work (13). Shortly, quality of sequencing reads was verified using MultiQC  
226 (20) and presence of read duplicates was examined using PicardTools (21). High-quality reads were then  
227 mapped to the NCBI reference genome of *C. autoethanogenum* NC\_022592.1 (14) and genomic features  
228 were assigned using Rsubread (22). Strandedness of reads for the strand-specific data of NuGEN, Qiagen,  
229 and Zymo was calculated using RSeQC v3.0.1 (23). Lastly, raw library sizes were normalised and transcript  
230 abundances were estimated as reads per kilobase of transcript per million reads mapped (RPKM) using  
231 edgeR (24) (see Table S1 for RPKM data). rRNA transcript abundances were removed prior to data analysis  
232 on Fig. 1 to avoid bias from variable efficiency of rRNA removal between kits. Hierarchical clustering of  
233 individual transcript abundances on Fig. 1C was performed using the ComplexHeatmap package in R

234 (version 2.10.0) (25). RNA-seq data has been deposited in the NCBI Gene Expression Omnibus repository  
235 under accession number GSE200959.

236

## 237 **Acknowledgements**

238 We thank Viktorija Kukuškina for valuable discussions.

239 This work was funded by the European Union's Horizon 2020 research and innovation programme  
240 under grant agreement N810755 and the Estonian Research Council's grant agreement PSG289.  
241 Australian Government funding through its investment agency, the Australian Research Council, towards  
242 the ARC Centre of Excellence in Synthetic Biology (CE200100029) is gratefully acknowledged. We thank  
243 the following investors in LanzaTech's technology: BASF, CICC Growth Capital Fund I, CITIC Capital, Indian  
244 Oil Company, K1W1, Khosla Ventures, the Malaysian Life Sciences, Capital Fund, L. P., Mitsui, the New  
245 Zealand Superannuation Fund, Novo Holdings A/S, Petronas Technology Ventures, Primetals, Qiming  
246 Venture Partners, Softbank China, and Suncor.

247 LanzaTech has interest in commercial gas fermentation with *C. autoethanogenum*. AH and MK are  
248 employees of LanzaTech.

249

## 250 **References**

- 251 1. Goodwin S, McPherson JD, McCombie WR. 2016. Coming of age: ten years of next-generation  
252 sequencing technologies. *Nat Rev Genet* 17:333–351.
- 253 2. Wang Z, Gerstein M, Snyder M. 2009. RNA-Seq: a revolutionary tool for transcriptomics. *Nat Rev*  
254 *Genet* 10:57–63.
- 255 3. Wissink EM, Vihervaara A, Tippens ND, Lis JT. 2019. Nascent RNA analyses: tracking transcription  
256 and its regulation. *Nat Rev Genet* 20:705–723.

- 257 4. Ingolia NT, Ghaemmaghami S, Newman JRS, Weissman JS. 2009. Genome-wide analysis in vivo of  
258 translation with nucleotide resolution using ribosome profiling. *Science* 324:218–223.
- 259 5. Sharma CM, Hoffmann S, Darfeuille F, Reignier J, Findeiß S, Sittka A, Chabas S, Reiche K,  
260 Hackermüller J, Reinhardt R, Stadler PF, Vogel J. 2010. The primary transcriptome of the major human  
261 pathogen *Helicobacter pylori*. *Nature* 464:250–255.
- 262 6. Valgepea K, de Souza Pinto Lemgruber R, Meaghan K, Palfreyman RW, Abdalla T, Heijstra BD,  
263 Behrendorff JB, Tappel R, Köpke M, Simpson SD, Nielsen LK, Marcellin E. 2017. Maintenance of ATP  
264 Homeostasis Triggers Metabolic Shifts in Gas-Fermenting Acetogens. *Cell Syst* 4:505-515.e5.
- 265 7. Valgepea K, Loi KQ, Behrendorff JB, Lemgruber R de SP, Plan M, Hodson MP, Köpke M, Nielsen LK,  
266 Marcellin E. 2017. Arginine deiminase pathway provides ATP and boosts growth of the gas-fermenting  
267 acetogen *Clostridium autoethanogenum*. *Metab Eng* 41:202–211.
- 268 8. de Souza Pinto Lemgruber R, Valgepea K, Tappel R, Behrendorff JB, Palfreyman RW, Plan M,  
269 Hodson MP, Simpson SD, Nielsen LK, Köpke M, Marcellin E. 2019. Systems-level engineering and  
270 characterization of *Clostridium autoethanogenum* through heterologous production of poly-3-  
271 hydroxybutyrate (PHB). *Metab Eng* 53:12–23.
- 272 9. Köpke M, Simpson SD. 2020. Pollution to products: recycling of ‘above ground’ carbon by gas  
273 fermentation. *Curr Opin Biotechnol* 65:180–189.
- 274 10. Rosset R, Julien J, Monier R. 1966. Ribonucleic acid composition of bacteria as a function of growth  
275 rate. *J Mol Biol* 18:308–320.
- 276 11. Dennis PP. 1972. Regulation of Ribosomal and Transfer Ribonucleic Acid Synthesis in *Escherichia*  
277 *coli* B/r. *J Biol Chem* 247:2842–2845.
- 278 12. Valgepea K, de Souza Pinto Lemgruber R, Abdalla T, Binos S, Takemori N, Takemori A, Tanaka Y,  
279 Tappel R, Köpke M, Simpson SD, Nielsen LK, Marcellin E. 2018. H<sub>2</sub> drives metabolic rearrangements in gas-  
280 fermenting *Clostridium autoethanogenum*. *Biotechnol Biofuels* 11:55.

- 281 13. de Lima LA, Ingelman H, Brahmabhatt K, Reinmets K, Barry C, Harris A, Marcellin E, Köpke M,  
282 Valgepea K. 2022. Faster Growth Enhances Low Carbon Fuel and Chemical Production Through Gas  
283 Fermentation. *Front Bioeng Biotechnol* 10:879578.
- 284 14. Brown SD, Nagaraju S, Utturkar SM, De Tissera S, Segovia S, Mitchell W, Land ML, Dassanayake A,  
285 Köpke M. 2014. Comparison of single-molecule sequencing and hybrid approaches for finishing the  
286 genome of *Clostridium autoethanogenum* and analysis of CRISPR systems in industrial relevant Clostridia.  
287 *Biotechnol Biofuels* 7:40.
- 288 15. Valgepea K, Adamberg K, Seiman A, Vilu R. 2013. *Escherichia coli* achieves faster growth by  
289 increasing catalytic and translation rates of proteins. *Mol Biosyst* 9:2344.
- 290 16. Maier T, Schmidt A, Güell M, Kühner S, Gavin A-C, Aebersold R, Serrano L. 2011. Quantification of  
291 mRNA and protein and integration with protein turnover in a bacterium. *Mol Syst Biol* 7:511.
- 292 17. Esquerré T, Laguerre S, Turlan C, Carpousis AJ, Girbal L, Cocaign-Bousquet M. 2013. Dual role of  
293 transcription and transcript stability in the regulation of gene expression in *Escherichia coli* cells cultured  
294 on glucose at different growth rates. *Nucleic Acids Res* 42:2460–2472.
- 295 18. Al-Bassam M, Kim J, Zaramela LS, Kellman BP, Wozniak JM, Gonzalez DJ, Zengler K, Zuniga C. 2018.  
296 Optimization of carbon and energy utilization through differential translational efficiency. *Nat Commun*  
297 9:4474.
- 298 19. Shin J, Song Y, Kang S, Jin S, Lee J-K, Kim DR, Cho S, Müller V, Cho B-K. 2021. Genome-Scale Analysis  
299 of *Acetobacterium woodii* Identifies Translational Regulation of Acetogenesis. *mSystems* 6:e00696-21.
- 300 20. Ewels P, Magnusson M, Lundin S, Käller M. 2016. MultiQC: Summarize analysis results for multiple  
301 tools and samples in a single report. *Bioinformatics* 32:3047–3048.
- 302 21. Parekh S, Ziegenhain C, Vieth B, Enard W, Hellmann I. 2016. The impact of amplification on  
303 differential expression analyses by RNA-seq. *Sci Rep* 6:25533.

- 304 22. Liao Y, Smyth GK, Shi W. 2013. The Subread aligner: Fast, accurate and scalable read mapping by  
305 seed-and-vote. *Nucleic Acids Res* 41:e108.
- 306 23. Wang L, Wang S, Li W. 2012. RSeQC: quality control of RNA-seq experiments. *Bioinformatics*  
307 28:2184–2185.
- 308 24. Robinson MD, McCarthy DJ, Smyth GK. 2009. edgeR: A Bioconductor package for differential  
309 expression analysis of digital gene expression data. *Bioinformatics* 26:139–140.
- 310 25. Gu Z, Eils R, Schlesner M. 2016. Complex heatmaps reveal patterns and correlations in  
311 multidimensional genomic data. *Bioinformatics* 32:2847–2849.
